# Supplementary material for: Experimental Infection of Domestic Pigs with African Swine Fever Virus Isolated in 2019 in Mongolia
Source: MDPI journal article supplement (doi:10.3390/v14122698), 2022-12-01
Supplement: s1 [file s1]

**Table S1.** Clinical signs and scoring parameters. Previously described by Sunwoo et al. [22].

| Clinical Signs         | Severity (scoring) |                                                       |                                                               |                                                                                                                       |          |
|------------------------|--------------------|-------------------------------------------------------|---------------------------------------------------------------|-----------------------------------------------------------------------------------------------------------------------|----------|
|                        | 0                  | 1                                                     | 2                                                             | 3                                                                                                                     | 4*       |
| Liveliness             | No Abnormality     | Reduced liveliness, stands without help               | Sluggish, stands with help                                    | Dormant, refusal to stand with or without help                                                                        | Not Used |
| Body Shape             | No Abnormality     | Empty Stomach (sunken flanks)                         | Empty Stomach with weight loss indicators                     | Wasting (ribs, vertebrae visible, rough hair)                                                                         | Not Used |
| Breathing              | No Abnormality     | Increased Respiratory Rate                            | Significantly increased respiratory rate, abdominal breathing | Difficult Breathing (open mouth breathing, wheezing, coughing)                                                        | Not Used |
| Neurological Signs     | No Abnormality     | Stumbling gait, quickly corrected                     | Ataxia/paresis of the hindquarters, continues to walk         | Paralysis of the hindquarters, unable to stand, convulsions                                                           | Not Used |
| Skin                   | No Abnormality     | Red skin, cyanosis of the skin (<10%)                 | Cyanosis of the skin (10-25%), occasional skin bleeding       | Cyanosis of the skin (>25%), large blue/black spots, cold skin, large subcutaneous bleeding, skin necrosis/ulceration | Not Used |
| Digestive Symptoms     | No Abnormality     | Diarrhea (<24 Hours)                                  | Diarrhea (>24 hours), occasional vomiting                     | Bloody diarrhea and frequent vomiting                                                                                 | Not Used |
| Ocular/Nasal Discharge | No Abnormality     | Thin discharge from nose and/or eyes (w/o admixtures) | Thick discharge from nose and/or eyes (no blood)              | Bloody discharge from nose and/or eyes                                                                                | Not Used |
| Fever                  | 37.8-40.5°C        | ≥40.5°C, <41 °C                                       | ≥40.5°C for two sequential days, <41 °C                       | ≥41°C                                                                                                                 | < 37.8°C |

\*: This clinical score is only used in the fever category because it constitutes immediate euthanasia.

Table S2. Behavior assessment and scoring parameters.

| Behavior Assessment | Scoring                                                     |                                                    |                                                         |                                                                                     |                                                                  |
|---------------------|-------------------------------------------------------------|----------------------------------------------------|---------------------------------------------------------|-------------------------------------------------------------------------------------|------------------------------------------------------------------|
|                     | 0                                                           | 1                                                  | 2                                                       | 3                                                                                   | 4                                                                |
| Rope Chewing        | Participating exuberantly                                   | Participation is active but drops off more quickly | Participation starts slow and is poor                   | Refused to chew for longer than 5-10 seconds but shows interest in other activities | Not engaged, not participating                                   |
| Individual Swab     | Allows collection but protests as a normal pig              | Allows collection with minimal protest             | Allows collection but has moderately reduced liveliness | Not engaged seems unaware of the activity                                           | Not used                                                         |
| General Demeanor    | Normal: inquisitive, responsiveness to voice, wants to play | Initially is interested but drops off quickly      | Interest starts slow and is poor                        | Interest is very poor; markedly reduced and short lived                             | Not engaged, seems uninterested in activities; reluctant to move |

**Table S3.** Evaluation criteria for gross pathology and scoring. Scoring was modified from Galindo-Cardiel et al [24] and Sunwoo et al. [22].

| System             | Evaluation criteria and score                                                                                                                                                                                                                                                                               |
|--------------------|-------------------------------------------------------------------------------------------------------------------------------------------------------------------------------------------------------------------------------------------------------------------------------------------------------------|
| Body Condition     | 1 category scored: Normal (0); Mild (1), vertebrae and pelvic bones detectable by firm palpation and ribs not overtly visible but palpable; Moderate (2), vertebrae and pelvic bones visible and prominent ribs visible; Severe (3), vertebrae and pelvic bone obvious with muscle wasting, prominent ribs. |
| Integument         | 1 category: Normal (0); pronounced hyperemia; Mild (1); petechia/ecchymosis; Moderate (2); cyanosis/infarction; Severe (3).                                                                                                                                                                                 |
| Cardiovascular     | 2 categories scored*: a) Systemic evidence of hemorrhage, edema, and/or thrombosis of various organ systems such as: subcutaneous/intramuscular/abdominal/central nervous system/body cavity; b) heart: epicarditis, thrombosis or pericardial effusion.                                                    |
| Liver              | 2 categories scored*: a) Hepatopathy including enhanced lobular pattern, intrahepatic mottling, congestion, friable parenchyma; b) biliary tree: gall bladder, common bile duct and vascular hilus, edema and/or hemorrhage with prominent vasculature.                                                     |
| Lung               | 3 categories scored*: a) Swelling and edema; b) congestion and/or hemorrhage; c) pneumonia/consolidation characterized by pulmonary collapse and a lack of it leading to rib impressions.                                                                                                                   |
| Spleen             | 2 categories scored*: a) Congestion and/or hemorrhage; b) necrosis or infarction.                                                                                                                                                                                                                           |
| Lymph nodes/tonsil | 2 categories scored*: a) Edema and/or congestion; b) hemorrhage.                                                                                                                                                                                                                                            |
| Kidney             | 1 category scored*: Congestion, edema, hemorrhage, and/or thrombosis (multifocal, cortical, medullary, and/or subcapsular).                                                                                                                                                                                 |
| Gastrointestinal   | 5 categories scored**: a) Gastric hyperemia and/or ulceration; b) mucosal edema, hemorrhage, and/or necrosis of the intestinal tract; c) diarrhea; d) hemorrhagic diarrhea; e) ascites, fibrin, and/or peritonitis.                                                                                         |

\*: Each category was scored as normal (0), mild (1), moderate (2), or severe (3).

\*\*\*: Category (a) is scored as normal (0), mild (1), moderate (2), or severe (3). Category (b) is scored as mild to moderate (1) and severe or marked (2). Categories (c-e) are scored as one point if present regardless of severity.

Note: Each category is scored as described above (in table S3) and a total sum per animal is compiled to provide analytical interpretation of gross lesions. Total gross scores less than 30 represent overall mild gross ASFV lesions, 31-47 represent overall moderate gross lesions, while scores 48 or greater represent severe gross ASFV lesions. The maximum total score per pig is 84.

**Table S4:** Histological lesion score for lymphoid tissues of ASFV-MNG19 challenged animals.

| Organ                    | Criteria     | Pig ID # |     |     |     |     |     | Mean Score | Standard Deviation | 95% Confidence Interval |
|--------------------------|--------------|----------|-----|-----|-----|-----|-----|------------|--------------------|-------------------------|
|                          |              | 303      | 306 | 307 | 310 | 313 | 314 |            |                    |                         |
| Mesenteric Lymph Node    |              | 1        | 6   | 3   | 3   | 2   | 5   | 3.33       | 1.86               | 2.31                    |
|                          | Necrosis     | 1        | 3   | 1   | 1   | 1   | 2   |            |                    |                         |
|                          | Fibrin/clots | 0        | 1   | 1   | 1   | 0   | 2   |            |                    |                         |
|                          | Hemorrhage   | 0        | 1   | 0   | 0   | 0   | 0   |            |                    |                         |
|                          | Inflammation | 0        | 1   | 1   | 1   | 1   | 1   |            |                    |                         |
| Mandibular Lymph Node    |              | 6        | 8   | 3   | 4   | 7   | 9   | 6.17       | 2.32               | 2.88                    |
|                          | Necrosis     | 3        | 3   | 1   | 1   | 2   | 3   |            |                    |                         |
|                          | Fibrin/clots | 2        | 3   | 1   | 1   | 2   | 3   |            |                    |                         |
|                          | Hemorrhage   | 1        | 1   | 0   | 1   | 2   | 1   |            |                    |                         |
|                          | Inflammation | 0        | 1   | 1   | 1   | 1   | 2   |            |                    |                         |
| Tonsil                   |              | 10       | 7   | 2   | 2   | 2   | 10  | 5.50       | 3.99               | 4.95                    |
|                          | Necrosis     | 3        | 3   | 1   | 1   | 1   | 3   |            |                    |                         |
|                          | Fibrin/clots | 3        | 2   | 0   | 0   | 0   | 3   |            |                    |                         |
|                          | Hemorrhage   | 1        | 1   | 0   | 1   | 0   | 2   |            |                    |                         |
|                          | Inflammation | 3        | 1   | 1   | 0   | 1   | 2   |            |                    |                         |
| Gastrohepatic Lymph Node |              | 12       | 10  | 5   | 8   | 7   | 12  | 9.00       | 2.83               | 3.51                    |
|                          | Necrosis     | 3        | 3   | 1   | 1   | 2   | 3   |            |                    |                         |
|                          | Fibrin/clots | 3        | 2   | 1   | 2   | 1   | 3   |            |                    |                         |
|                          | Hemorrhage   | 4        | 3   | 2   | 4   | 3   | 4   |            |                    |                         |
|                          | Inflammation | 2        | 2   | 1   | 1   | 1   | 2   |            |                    |                         |

|                  |              |   |   |   |   |   |   |      |      |      |
|------------------|--------------|---|---|---|---|---|---|------|------|------|
| Renal Lymph Node |              | 8 | 9 | 7 | 6 | 7 | 9 | 7.67 | 1.21 | 1.50 |
|                  | Necrosis     | 2 | 3 | 3 | 1 | 2 | 3 |      |      |      |
|                  | Fibrin/clots | 2 | 2 | 2 | 1 | 1 | 2 |      |      |      |
|                  | Hemorrhage   | 3 | 3 | 1 | 3 | 3 | 3 |      |      |      |
|                  | Inflammation | 1 | 1 | 1 | 1 | 1 | 1 |      |      |      |

|                                |              |    |    |    |    |    |    |      |      |      |
|--------------------------------|--------------|----|----|----|----|----|----|------|------|------|
| Cranial Mediastinal Lymph Node |              | 6  | 12 | 1  | 8  | 6  | 8  | 6.83 | 3.60 | 4.47 |
|                                | Necrosis     | 2  | 4  | 1  | 3  | 2  | 3  |      |      |      |
|                                | Fibrin/clots | 2  | 3  | 0  | 3  | 1  | 3  |      |      |      |
|                                | Hemorrhage   | 1  | 4  | 0  | 1  | 2  | 0  |      |      |      |
|                                | Inflammation | 1  | 1  | 0  | 1  | 1  | 2  |      |      |      |
| Prescapular Lymph Node         |              | 6  | 8  | 1  | 1  | 7  | 11 | 5.67 | 3.98 | 4.95 |
|                                | Necrosis     | 1  | 4  | 1  | 1  | 3  | 4  |      |      |      |
|                                | Fibrin/clots | 1  | 2  | 0  | 0  | 1  | 4  |      |      |      |
|                                | Hemorrhage   | 1  | 1  | 0  | 0  | 1  | 0  |      |      |      |
|                                | Inflammation | 3  | 1  | 0  | 0  | 2  | 3  |      |      |      |
| Inguinal Lymph Node            |              | 7  | 3  | 1  | 1  | 8  | 11 | 5.17 | 4.12 | 5.11 |
|                                | Necrosis     | 1  | 2  | 1  | 1  | 2  | 4  |      |      |      |
|                                | Fibrin/clots | 3  | 1  | 0  | 0  | 3  | 4  |      |      |      |
|                                | Hemorrhage   | 2  | 0  | 0  | 0  | 1  | 0  |      |      |      |
|                                | Inflammation | 1  | 0  | 0  | 0  | 2  | 3  |      |      |      |
| Ileocecal Lymph Node           |              | 7  | 7  | 1  | 10 | 11 | 6  | 7.00 | 3.52 | 4.37 |
|                                | Necrosis     | 3  | 3  | 1  | 3  | 3  | 2  |      |      |      |
|                                | Fibrin/clots | 3  | 2  | 0  | 2  | 3  | 1  |      |      |      |
|                                | Hemorrhage   | 0  | 1  | 0  | 4  | 3  | 0  |      |      |      |
|                                | Inflammation | 1  | 1  | 0  | 1  | 2  | 3  |      |      |      |
| Total score***                 |              | 63 | 70 | 24 | 43 | 57 | 81 |      |      |      |

\*\*\*Total possible score for each lymph node is 16 and the total possible score is 144. Lesions are ranked as mild: < 30, moderate: 31-60, severe: 61-80, marked: 80+.

**Table S5:** Identified mutations between ASFV-MNG19 original stock and challenge inoculum.

| Position    | ASFV-MNG19 Original Stock | ASFV-MNG19 P1 PAM | Amino Acid Change | Gene      |
|-------------|---------------------------|-------------------|-------------------|-----------|
| 36244-36245 | GC                        | AA                | Q281K             | MGF505-4R |
| 36268       | G                         | A                 | Synonymous        | MGF505-4R |
| 36272       | G                         | A                 | E290K             | MGF505-4R |
| 105225      | C                         | A                 | N11K              | B125R     |
| 105229      | G                         | A                 | E13K              | B125R     |
| 110321      | C                         | A                 | Synonymous        | G1340L    |
| 110329      | T                         | A                 | N809Y             | G1340L    |

**Table S6.** Behavior assessment scores.

| Pig ID #   | Criteria         | DPC      |          |          |
|------------|------------------|----------|----------|----------|
|            |                  | 1        | 3        | 5        |
| <b>303</b> |                  | <b>0</b> | <b>0</b> | <b>4</b> |
|            | Rope Chewing     | 0        | 0        | 2        |
|            | Individual Swab  | 0        | 0        | 0        |
|            | General Demeanor | 0        | 0        | 2        |
| <b>306</b> |                  | <b>0</b> | <b>0</b> | <b>2</b> |
|            | Rope Chewing     | 0        | 0        | 1        |
|            | Individual Swab  | 0        | 0        | 0        |
|            | General Demeanor | 0        | 0        | 1        |
| <b>307</b> |                  | <b>0</b> | <b>0</b> | <b>8</b> |
|            | Rope Chewing     | 0        | 0        | 4        |
|            | Individual Swab  | 0        | 0        | 0        |
|            | General Demeanor | 0        | 0        | 4        |
| <b>310</b> |                  | <b>0</b> | <b>0</b> | <b>8</b> |
|            | Rope Chewing     | 0        | 0        | 4        |
|            | Individual Swab  | 0        | 0        | 0        |
|            | General Demeanor | 0        | 0        | 4        |
| <b>313</b> |                  | <b>0</b> | <b>0</b> | <b>4</b> |
|            | Rope Chewing     | 0        | 0        | 2        |
|            | Individual Swab  | 0        | 0        | 0        |
|            | General Demeanor | 0        | 0        | 2        |
| <b>314</b> |                  | <b>0</b> | <b>0</b> | <b>8</b> |
|            | Rope Chewing     | 0        | 0        | 4        |
|            | Individual Swab  | 0        | 0        | 0        |
|            | General Demeanor | 0        | 0        | 4        |

**Table S7:** Gross lesion scores for ASFV-MNG19 infected animals.

| Organ System          | 303<br>Lesions (score)                                                                          | 306<br>Lesions (score)                               | 307<br>Lesions (score)                                                                                                                                | 310<br>Lesions (score)                                                                        | 313<br>Lesions (score)                                             | 314<br>Lesions (score)                                                                               |
|-----------------------|-------------------------------------------------------------------------------------------------|------------------------------------------------------|-------------------------------------------------------------------------------------------------------------------------------------------------------|-----------------------------------------------------------------------------------------------|--------------------------------------------------------------------|------------------------------------------------------------------------------------------------------|
| <b>Body Condition</b> | Prominent ribs and pelvis, moderate loss of body condition; (2)                                 | Mild loss of body condition with muscle atrophy; (1) | Sunken flanks and ribs are prominent; (2)                                                                                                             | Mild loss of body condition; (1)                                                              | Mild loss of body condition with muscle atrophy; (3)               | Moderate loss of body condition with muscle atrophy; (3)                                             |
| <b>Integument</b>     | Ventrally diffuse moderate ecchymosis; (2)                                                      | Mild cutaneous hyperemia; (1)                        | Multifocal cutaneous hyperemia; (1)                                                                                                                   | Ventrally Diffuse moderate ecchymosis; (2)                                                    | Mild Multifocal ecchymosis; (2)                                    | Mild Multifocal ecchymosis; (2)                                                                      |
| <b>Cardiovascular</b> | Mild focal fibrinous pericarditis of left ventricle; (2)                                        | Mild cervical hemorrhage and polyserositis; (4)      | Severe cervical hemorrhage with thrombi. thrombi in the subsinusoidal interventricular branch of right coronary artery. Hemorrhagic left auricle; (2) | Moderate hemorrhage of the right atria or auricle. Multifocal fibrous of right ventricle; (1) | Moderate hemorrhage of the left auricle, pericardial effusion; (2) | Mild congestion of interventricular vasculature; (3)                                                 |
| <b>Liver</b>          | Mild congestion of the gall bladder and bile ducts; (1)                                         | Congested bile ducts; (2)                            | Normal with a full gall bladder.; (0)                                                                                                                 | Congestion of hepatic vascular, enlarged gall bladder; (2)                                    | Cholestasis, congested hepatic vascular; (2)                       | Cholestasis, congest hepatic vasculature; (2)                                                        |
| <b>Lung</b>           | Multifocal pulmonary hemorrhages, Severe pulmonary congestion with edema and consolidation; (6) | Mild pulmonary edema; (1)                            | Multifocal to coalescing thrombi, pulmonary congestion and edema; (4)                                                                                 | Moderate to severe pulmonary congestion with edema and consolidation ; (5)                    | Severe pulmonary edema and multifocal congestion; (5)              | Severe pulmonary congestion with edema and consolidation with pneumonia (multifocal to diffuse); (7) |
| <b>Spleen</b>         | Moderate hemorrhagic splenomegaly; (3)                                                          | Moderate hemorrhagic splenomegaly; (3)               | Severe multifocal necrotic hemorrhagic splenomegaly; (5)                                                                                              | Severe hemorrhagic splenomegaly with necrotic foci; (4)                                       | Multifocal hemorrhagic splenomegaly; (3)                           | Severe hemorrhagic splenomegaly; (5)                                                                 |



|                         |                                                                                                                                       |                                                                                                                                                           |                                                 |                                                                                                    |                                                                                                  |                                                                                                                    |
|-------------------------|---------------------------------------------------------------------------------------------------------------------------------------|-----------------------------------------------------------------------------------------------------------------------------------------------------------|-------------------------------------------------|----------------------------------------------------------------------------------------------------|--------------------------------------------------------------------------------------------------|--------------------------------------------------------------------------------------------------------------------|
| <b>Kidney</b>           | Moderate diffuse corticomedullary congestion; (1)                                                                                     | Focal corticomedullary thrombi; (1)                                                                                                                       | Mild diffuse corticomedullary congestion ; (1)  | Mild diffuse edema; (1)                                                                            | Moderate corticomedullary congestion, multifocal cortical thrombosis; (2)                        | Perirenal serous effusion, cortical petechiation; Mild corticomedullary congestion.; (2)                           |
| <b>Gastrointestinal</b> | Moderate hyperemia of the gastric mucosa. Moderate hemorrhagic colitis, petechiation of the rectal mucosa, ascites, and diarrhea. (7) | Moderate hyperemia of the gastric mucosa. Mild hemorrhagic enteritis, petechiation of the colon and serosanguineous ascites with fibrin and diarrhea; (7) | Mild hyperemic gastric mucosa and diarrhea; (4) | Mild hyperemia of the gastric mucosa. Mild mucosal edema of the small intestines and diarrhea; (3) | Mild hyperemia of the gastric mucosa. Moderate mucosal edema with petechiation of the colon; (5) | Moderate hyperemia of the gastric mucosa. Moderate mucosal edema and necrotic enteritis. Ascites and diarrhea; (9) |

**Table S8:** Gross lesion score for lymphoid tissues of ASFV-MNG19 infected animals.

| <b>Lymphoid Tissue</b>                | <b>303 Lesions (score)</b>              | <b>306 Lesions (score)</b>                | <b>307 Lesions (score)</b>          | <b>310 Lesions (score)</b>                | <b>313 Lesions (score)</b>                                | <b>314 Lesions (score)</b>                |
|---------------------------------------|-----------------------------------------|-------------------------------------------|-------------------------------------|-------------------------------------------|-----------------------------------------------------------|-------------------------------------------|
| <b>Mandibular Lymph Node</b>          | Mild lymphadenopathy; (0)               | Severe edematous lymphadenopathy; (3)     | Normal; (0)                         | Mild hemorrhagic lymphadenopathy; (2)     | Severe hemorrhagic lymphadenopathy; (5)                   | Mild lymphadenopathy; (2)                 |
| <b>Cranial Mediastinal Lymph Node</b> | Mild hemorrhagic lymphadenopathy; (2)   | Moderate hemorrhagic lymphadenopathy; (4) | Mild edematous lymphadenopathy; (1) | Moderate hemorrhagic lymphadenopathy; (3) | Severe hemorrhagic lymphadenopathy; (5)                   | Moderate hemorrhagic lymphadenopathy; (4) |
| <b>Mesenteric Lymph Node</b>          | Mild lymphadenopathy; (2)               | Moderate edematous lymphadenopathy; (2)   | Mild edematous lymphadenopathy; (1) | Moderate hemorrhagic lymphadenopathy; (3) | Severe hemorrhagic lymphadenopathy; (5)                   | Mild lymphadenopathy; (2)                 |
| <b>Renal Lymph Node</b>               | Severe hemorrhagic lymphadenopathy; (6) | Severe hemorrhagic lymphadenopathy; (6)   | Mild edematous lymphadenopathy; (1) | Severe hemorrhagic lymphadenopathy; (6)   | Severe hemorrhagic lymphadenopathy; (6)                   | Severe hemorrhagic lymphadenopathy; (6)   |
| <b>Gastrohepatic Lymph Node</b>       | Severe hemorrhagic lymphadenopathy; (6) | Severe hemorrhagic lymphadenopathy; (6)   | Mild edematous lymphadenopathy; (1) | Severe hemorrhagic lymphadenopathy; (6)   | Severe hemorrhagic lymphadenopathy; (6)                   | Moderate hemorrhagic lymphadenopathy; (5) |
| <b>Prescapular Lymph Node</b>         | Mild hemorrhagic lymphadenopathy; (2)   | Mild lymphadenopathy; (1)                 | Normal; (0)                         | Mild hemorrhagic lymphadenopathy; (2)     | Moderate lymphadenopathy; (3)                             | Moderate lymphadenopathy; (3)             |
| <b>Tonsil</b>                         | Normal; (0)                             | Mild congestion with edema; (1)           | Normal; (0)                         | Mild congestion with edema; (1)           | Severe congestion and edema with moderate hemorrhage; (5) | Severe congestion and edema; (3)          |
| <b>Severity (total score) *</b>       | Moderate; (42)                          | Moderate; (43)                            | Mild; (23)                          | Moderate; (42)                            | Severe; (59)                                              | Severe; (58)                              |

\*: Total gross score includes scores from table S7 and table S8.
